# Supplementary material for: A secretory kinase complex regulates extracellular protein phosphorylation
Source: eLife journal article supplement (doi:10.7554/elife.06120), 2015-03-19
Supplement: supp [file elife-06120-supp-v1.zip]

Archive with 9 entries (9 files):
- elife_poa_e06120_Figure_5_figure_supplement_1.pdf
- elife_poa_e06120_Figure_2_figure_supplement_2.pdf
- elife_poa_e06120_Figure_3_figure_supplement_1.pdf
- elife_poa_e06120_Figure_3_figure_supplement_2.pdf
- elife_poa_e06120_Figure_2_figure_supplement_1.pdf
- elife_poa_e06120_Figure_4_figure_supplement_2.pdf
- elife_poa_e06120_Figure_4_figure_supplement_3.pdf
- elife_poa_e06120_Figure_4_figure_supplement_1.pdf
- elife_poa_e06120_Figure_1_figure_supplement_1.pdf
