# Supplementary material for: A secretory kinase complex regulates extracellular protein phosphorylation
Source: eLife journal article supplement (doi:10.7554/elife.06120), 2015-03-19
Supplement: supp [file elife-06120-supp-v1.zip › elife_poa_e06120_Figure_2_figure_supplement_1.pdf]

# Figure 2-figure supplement 1

|           |                               |  | P     | ----                | Fam20-loop---- | T                        | P                      |                 |            |               | C              | I               | I         |                |                  |               |               |              |              |           |          |               |           |           |               |               |         |           |   |   |          |           |              |        |            |           |           |              |           |           |        |           |       |             |            |             |             |   |             |        |       |       |        |       |        |        |           |        |           |       |        |           |
|-----------|-------------------------------|--|-------|---------------------|----------------|--------------------------|------------------------|-----------------|------------|---------------|----------------|-----------------|-----------|----------------|------------------|---------------|---------------|--------------|--------------|-----------|----------|---------------|-----------|-----------|---------------|---------------|---------|-----------|---|---|----------|-----------|--------------|--------|------------|-----------|-----------|--------------|-----------|-----------|--------|-----------|-------|-------------|------------|-------------|-------------|---|-------------|--------|-------|-------|--------|-------|--------|--------|-----------|--------|-----------|-------|--------|-----------|
| AFK       | 1CJA_A                        |  | RSEKG | -IEGLFFV            | ete-SGVFIV     | KRSt-----                | NIESE                  | TFCSLL          | CMRLGI     | --HAPKVRV     | VSSN[26]qANILL | MELVRGI[15]KSTM | QQLGSL    | IMALD          | VIVNNS           | DR[9]NLDNI    | [4]RGAT       | TVVPID       | DSKI         |           |          |               |           |           |               |               |         |           |   |   |          |           |              |        |            |           |           |              |           |           |        |           |       |             |            |             |             |   |             |        |       |       |        |       |        |        |           |        |           |       |        |           |
| CtkA      | 3AKK_A                        |  | KGFGG | ANGNKISLFy-nNELYMVK | FPPkpth-----   | kemstyn                  | GCFSEY                 | VACHIVNS        | LGL--KVQET | ILGTYK---NKIV | VVACKD         | FTTH[41]KVLK    | CFFWDM    | FVADTLL        | GNFDR---         | HNGNW[9]EYQ   | IAPIFD        | CCGS         |              |           |          |               |           |           |               |               |         |           |   |   |          |           |              |        |            |           |           |              |           |           |        |           |       |             |            |             |             |   |             |        |       |       |        |       |        |        |           |        |           |       |        |           |
| HipA      | 3FBR_A                        |  | ISVAG | -AQEK               | TALLR[14]THII  | KLP                      | Igeirqp----            | natldlsq        | SVDNE      | EYYCLLL       | AKELGI--NVPDAE | TIKAG---NVR     | ALAVE     | RFDRR[49]LKDRY | DFMKFQV          | FOWLIGAT      | QG---         | HAKNF[8]SYRL | TPFYDI       | IS        |          |               |           |           |               |               |         |           |   |   |          |           |              |        |            |           |           |              |           |           |        |           |       |             |            |             |             |   |             |        |       |       |        |       |        |        |           |        |           |       |        |           |
| Fam20C    | 4KQB_B                        |  | IMDGG | -TQVKFVFT           | FknDKQAV       | KPKPMR                   | fgrdyesdpnhfyfsdf      | RHHAE           | EIA        | TFHLD         | RVLGF--rRAIPT  | VGRVLN[46]MKEG  | SVQVFL    | PDE[44]GRRLLD  | LVDI             | HILDYLI       | GNQDR---      | HH---        | [9]LPSY      | AIHLDHGR  |          |               |           |           |               |               |         |           |   |   |          |           |              |        |            |           |           |              |           |           |        |           |       |             |            |             |             |   |             |        |       |       |        |       |        |        |           |        |           |       |        |           |
| Fam20C    |                               |  |       |                     |                |                          |                        |                 |            |               |                |                 |           |                |                  |               |               |              |              |           |          |               |           |           |               |               |         |           |   |   |          |           |              |        |            |           |           |              |           |           |        |           |       |             |            |             |             |   |             |        |       |       |        |       |        |        |           |        |           |       |        |           |
| 116174742 | Homo sapiens                  |  | MKSGG | -TQLKLIMTFQNYG      | QALBKPMKQ      | TREQETPPDFFFYFSDYERHNAE  | IAAFHLDRLILDF--RRVPP   | VAGRMVN[47]QIEG | S          | LA            | AF             | PDL[42]SHRILD   | VMDMTIFD  | FLMGNM         | DR---            | HH---         | [8]NET        | FIIHLDNGR    |              |           |          |               |           |           |               |               |         |           |   |   |          |           |              |        |            |           |           |              |           |           |        |           |       |             |            |             |             |   |             |        |       |       |        |       |        |        |           |        |           |       |        |           |
| 167234439 | Mus musculus                  |  | MKSGG | -TQLKLIMTFQNYG      | QALBKPMKQ      | TREQETPPDFFFYFSDYERHNAE  | IAAFHLDRLILDF--RRVPP   | VAGRMIN[47]QIEG | S          | LA            | AF             | PDL[42]GHRILD   | IMDMTVFD  | FLMGNM         | DR---            | HH---         | [8]NET        | FIIHLDNGR    |              |           |          |               |           |           |               |               |         |           |   |   |          |           |              |        |            |           |           |              |           |           |        |           |       |             |            |             |             |   |             |        |       |       |        |       |        |        |           |        |           |       |        |           |
| 118097727 | Gallus gallus                 |  | MKSGG | -TQLKLIMTFQNYG      | QALBKPMKQ      | TREQETPPDFFFYFSDYERHNAE  | IAAFHLDRLILDF--RRVPP   | VAGRLVN[47]QIEG | S          | LA            | AF             | PDL[42]GTRILD   | IMDMTVFD  | FLMGNM         | DR---            | HH---         | [8]NET        | FIIHLDNGR    |              |           |          |               |           |           |               |               |         |           |   |   |          |           |              |        |            |           |           |              |           |           |        |           |       |             |            |             |             |   |             |        |       |       |        |       |        |        |           |        |           |       |        |           |
| 118082702 | Gallus gallus                 |  | QKSGG | -TQLKLIMTFSNYG      | QALBKPMQ       | SRDQETPADFFYFSDFERHNAE   | IAAFHLDRLILDF--RRIPP   | VS              | GR         | L             | V              | N[47]QLEG       | S         | MA             | ALLPDK[42]GHRLLD | LIDMAVLD      | FLMGNM        | DR---        | HH---        | [8]NDT    | FLHLDNGR |               |           |           |               |               |         |           |   |   |          |           |              |        |            |           |           |              |           |           |        |           |       |             |            |             |             |   |             |        |       |       |        |       |        |        |           |        |           |       |        |           |
| 301604708 | Xenopus (Silurana) tropicalis |  | MKTGG | -TQLKLILTFQNYG      | QALBKPMKQ      | TREQETPPDFFFYFSDYERHNS   | IAAFHLDRLILDF--RRVPP   | VS              | GR         | L             | V              | N[47]QLEG       | S         | LA             | AF               | PDL[42]GTRLLD | LIDMTVFD      | FLMGNM       | DR---        | HH---     | [8]NET   | FIIHLDNGR     |           |           |               |               |         |           |   |   |          |           |              |        |            |           |           |              |           |           |        |           |       |             |            |             |             |   |             |        |       |       |        |       |        |        |           |        |           |       |        |           |
| 301608448 | Xenopus (Silurana) tropicalis |  | QKPGG | -TQLKLLMTFPNYG      | QALBKPMKQ      | TREQETPADFFYFSDFERHNAE   | IAAFHLDRLILDF--RRIPP   | V               | GR         | L             | V              | N[47]LLEG       | S         | V              | AA               | FL            | LPD[42]GTRLLD | LIDMAILD     | FLMGNQ       | DR---     | HH---    | [8]NQ         | T         | F         | L             | H             | L       | D         | N | G | R        |           |              |        |            |           |           |              |           |           |        |           |       |             |            |             |             |   |             |        |       |       |        |       |        |        |           |        |           |       |        |           |
| 326678626 | Danio rerio                   |  | QKSGG | -TQLKLVMSPFNYG      | QALBKPMQ       | QERHEETNVNLYYFSDFERHNAE  | IAAFHLDRLILGF--RRIPP   | V               | I          | G             | R              | L               | N[47]KLEG | S              | LA               | V             | M             | L            | PDL[42]GTRLV | DVIDMSILD | FLMSNM   | DR---         | HH---     | [8]NDT    | FLIHLNDR      |               |         |           |   |   |          |           |              |        |            |           |           |              |           |           |        |           |       |             |            |             |             |   |             |        |       |       |        |       |        |        |           |        |           |       |        |           |
| 326672328 | Danio rerio                   |  | MKSGG | -TQLKLIMTFQNYG      | QALBKPMKQ      | TREQETPPDFFFYFSDFERHNAE  | IAAYHLDRLILDF--RRVPP   | V               | AG         | R             | L              | V               | N[47]QIEG | S              | LA               | AF            | PDL[42]GTRLLD | IMDMTIFD     | FLMGNM       | DR---     | HH---    | [8]NET        | FIIHLDNGR |           |               |               |         |           |   |   |          |           |              |        |            |           |           |              |           |           |        |           |       |             |            |             |             |   |             |        |       |       |        |       |        |        |           |        |           |       |        |           |
| 292612252 | Danio rerio                   |  | MKSGG | -TQLKLIMSFQNYG      | QALBKPMKQ      | TREQETPPDFFFYFSDFERHNAE  | IAAFHLDRLILDF--RRVPP   | V               | AG         | R             | L              | V               | N[47]QIEG | S              | LA               | AF            | PDL[42]GTRLLD | IMDMTIFD     | FLMGNM       | DR---     | HH---    | [8]NDT        | FIIHLDNGR |           |               |               |         |           |   |   |          |           |              |        |            |           |           |              |           |           |        |           |       |             |            |             |             |   |             |        |       |       |        |       |        |        |           |        |           |       |        |           |
| 58396929  | Takifugu rubripes             |  | QKTGG | -TQLKLIMSFQNYG      | QALBKPMQ       | S                        | RQ                     | AE              | T          | D             | V              | N               | L         | F              | Y                | F             | S             | D            | F            | ERHNAE    | IAAFHLD  | RLLGLF--RRVPP | V         | AG        | R             | L             | V       | N[47]LLEG | S | V | AA       | FL        | LPD[42]GTRLV | D      | LIDMAVLD   | FLMGNM    | DR---     | HH---        | [8]NDT    | FVLHLDHGR |        |           |       |             |            |             |             |   |             |        |       |       |        |       |        |        |           |        |           |       |        |           |
| 58396933  | Takifugu rubripes             |  | QKSGG | -TQLKLVMSPFNYG      | QALBKPMQ       | Q                        | R                      | E               | E          | T             | N              | Y               | N         | L              | Y                | F             | S             | D            | F            | ERHNAE    | IAAFHLD  | R             | L         | I         | G             | F--RRIPP      | AV      | G         | R | L | V        | D[47]GLEA | S            | LA     | V          | M         | L         | PDL[42]GTRLV | D         | FMDMVLD   | FLMSNM | DR---     | HH--- | [8]NYT      | FLHLDNGR   |             |             |   |             |        |       |       |        |       |        |        |           |        |           |       |        |           |
| 58396931  | Takifugu rubripes             |  | MKSGG | -TQLKLIMTFQNYG      | QALBKPMKQ      | TREQETPPDFFFYFSDFERHNAE  | IAAFHLDRLVLDLF--RRVPP  | V               | AG         | R             | L              | V               | N[47]QIEG | S              | LA               | AF            | PDL[42]GTRLLD | IMDMTIFD     | FLMGNM       | DR---     | HH---    | [8]NET        | FIIHLDNGR |           |               |               |         |           |   |   |          |           |              |        |            |           |           |              |           |           |        |           |       |             |            |             |             |   |             |        |       |       |        |       |        |        |           |        |           |       |        |           |
| 58396927  | Takifugu rubripes             |  | MKSGG | -TQLKLIMTFQNYG      | QALBKPMKQ      | TREQETPPDFFFYFSDFERHNAE  | IAAFHLDKILDF--RRVPP    | V               | AG         | R             | L              | V               | N[47]QIEG | S              | LA               | AF            | PDL[42]GTRLLD | VMDMTVFD     | FLMGNM       | DR---     | HH---    | [8]NDT        | FIIHLDNGR |           |               |               |         |           |   |   |          |           |              |        |            |           |           |              |           |           |        |           |       |             |            |             |             |   |             |        |       |       |        |       |        |        |           |        |           |       |        |           |
| 291222385 | Saccoglossus kowalevskii      |  | EKSGG | -TQVKLIIDFIDGG      | QALBKPMK       | VPRDYQTVDPDHFYFSDFERHNAE | IASFHLDRLILDF--RRAPP   | V               | GR         | L             | V              | N[46]MIEG       | S         | LA             | AF               | LPD[42]GRRLLD | LMDLAVLD      | FLIGNM       | DR---        | HH---     | [8]NYT   | YPLHLDQGR     |           |           |               |               |         |           |   |   |          |           |              |        |            |           |           |              |           |           |        |           |       |             |            |             |             |   |             |        |       |       |        |       |        |        |           |        |           |       |        |           |
| 324508203 | Ascaris suum                  |  | IMEGG | -TQVKLIITFSNDE      | QAVEKPMR       | FGRDYESDPNHFYFSDFERHHA   | EIA                    | T               | F          | H             | L              | D               | K         | I              | L                | QF--RRAV      | P             | T            | V            | G         | R        | I             | F         | N[46]MKEG | SVQVFL        | PDE[44]GRRLLD | L       | I         | D | L | HIMDYLI  | GNQDR---  | HH---        | [9]APS | YAIHLDNGR  |           |           |              |           |           |        |           |       |             |            |             |             |   |             |        |       |       |        |       |        |        |           |        |           |       |        |           |
| 170587370 | Brugia malayi                 |  | IMDGG | -TQVKLIITFFEND      | QQAVKPMR       | FGRDYESDPNHFYFSDFERHNAE  | IA                     | T               | F          | H             | M              | D               | K         | I              | L                | GF--RRAV      | P             | T            | V            | G         | R        | I             | F         | N[46]TREG | SVQVFL        | PDE[44]GRTLLD | L       | V         | D | F | HVM      | DYLI      | GNQDR---     | HH---  | [9]APS     | YAIHLDNGR |           |              |           |           |        |           |       |             |            |             |             |   |             |        |       |       |        |       |        |        |           |        |           |       |        |           |
| 17568439  | Caenorhabditis elegans        |  | IMDGG | -TQVKFVFT           | FkNDKQAV       | KPKPMR                   | FGRDYESDPNHFYFSDFERHHA | EIA             | T          | F             | H              | L               | D         | R              | V                | L             | GF--RRAIPT    | V            | G            | R         | V        | L             | N[46]MKEG | SVQVFL    | PDE[44]GRRLLD | L             | V       | D         | I | H | I        | DYLI      | GNQDR---     | HH---  | [9]LPSY    | AIHLDHGR  |           |              |           |           |        |           |       |             |            |             |             |   |             |        |       |       |        |       |        |        |           |        |           |       |        |           |
| 316974654 | Trichinella spiralis          |  | IMKGG | -TQVKLLIITFKNGR     | QAVKPMR        | FDRNHEADPNHFYFSDFERHNAE  | IAAFHLDKVLGY--NRAIPT   | V               | G          | R             | V              | L               | N[46]TIEG | S              | LA               | Q             | M             | F            | I            | D         | T        | P[45]GRLLD    | L         | I         | D             | M             | S       | I         | L | D | FLMGNQ   | DR---     | HH---        | [9]VE  | VATVHVDNGR |           |           |              |           |           |        |           |       |             |            |             |             |   |             |        |       |       |        |       |        |        |           |        |           |       |        |           |
| 333467816 | Anopheles gambiae str. PEST   |  | QKEGG | -TQLKLIIIDYPNE      | VHALBKPMR      | F                        | P                      | R               | E          | Q             | T              | L               | P         | N              | H                | F             | Y             | F            | T            | D         | Y        | E             | R         | H         | T             | AE            | IAAFHLD | R         | L | L | G        | F--RRAMP  | V            | T      | G          | R         | I         | L            | N[46]TLEG | S         | FA     | AF        | L     | P           | T          | Q[42]GRRLLD | L           | M | D           | M      | A     | V     | F      | D     | FLTGNM | DR---  | HH---     | [8]NDT | FPIHLDHGR |       |        |           |
| 321472747 | Daphnia pulex                 |  | QKEGG | -TQLKLIVIEFAP       | GGMAM          | KPMR                     | F                      | P               | R          | E             | Q              | T               | L         | P              | N                | H             | F             | Y            | F            | T         | D        | Y             | E         | R         | H             | NAE           | IAAFHLD | R         | I | M | G        | F--RRAPP  | V            | V      | G          | R         | L         | V            | N[46]QME  | A         | S      | LA        | AF    | L           | P          | D           | K[42]GRRLV  | D | LIDLAIFD    | FLAGNM | DR--- | HH--- | [8]NQ  | T     | F      | P      | I         | H      | L         | D     | Q      | GR        |
| 328721529 | Acyrtosiphon pisum            |  | QKEGG | -TQLKLIVIEYSNGD     | KALBKPMR       | F                        | T                      | R               | E          | Q             | T              | L               | P         | N              | H                | F             | Y             | F            | T            | D         | Y        | E             | R         | H         | NAE           | IAAFHLD       | R       | L         | L | G | F--RRAMP | V         | G            | R      | L          | V         | N[47]MLEG | S            | FA        | AF        | L      | P         | S     | Q[42]GRRMLD | I          | M           | D           | L | S           | V      | F     | D     | FLMGNM | DR--- | HH---  | [8]NDS | FPIHLDHGR |        |           |       |        |           |
| 91089387  | Tribolium castaneum           |  | QKSGG | -TQLKLVIDYPNH       | LQALBKPMR      | F                        | P                      | R               | E          | Q             | T              | L               | P         | N              | H                | F             | Y             | F            | T            | D         | Y        | E             | R         | H         | NAE           | IAAFHLD       | R       | L         | L | G | F--RRAMP | V         | T            | G      | R          | L         | L         | N[46]SLEG    | S         | FA        | AF     | L         | P     | S           | N[42]GRRLY | D           | L           | M | D           | M      | A     | V     | L      | D     | FLMGNM | DR---  | HH---     | [8]NDT | FPLHLDHGR |       |        |           |
| 156549105 | Nasonia vitripennis           |  | EKSGG | -TQLKLVM            | DYPN           | KMQALBKPMR               | F                      | P               | R          | E             | Q              | T               | L         | P              | N                | H             | F             | Y            | F            | T         | D        | Y             | E         | R         | H             | NAE           | IAAFHLD | R         | L | L | D        | F--RR     | C            | M      | P          | V         | T         | G            | R         | T         | L      | N[47]QLEG | S     | FA          | AF         | L           | P           | D | K[42]GRRLLD | L      | I     | D     | M      | S     | V      | F      | D         | FLTGNM | DR---     | HH--- | [8]NET | FTLHLDNGR |
| 32782804  | Apis mellifera                |  | QKEGG | -TQLKLQINYSN        | -MQALE         | KPMR                     | F                      | P               | R          | E             | Q              | T               | L         | P              | N                | H             | F             | Y            | F            | T         | D        | F             | E         | R         | H             | T             | AE      | IAAFHLD   | R | L | L        | G         | F--RRAMP     | V      | T          | G         | R         | T            | L         | N[46]TLEG | S      | FA        | AF    | L           | P          | D           | K[42]GRRLLD | L | M           |        |       |       |        |       |        |        |           |        |           |       |        |           |
