# Supplementary figures and images for: A secretory kinase complex regulates extracellular protein phosphorylation
Source: eLife journal article supplement (doi:10.7554/elife.06120), 2015-03-19

## Figure 5-figure supplement 1

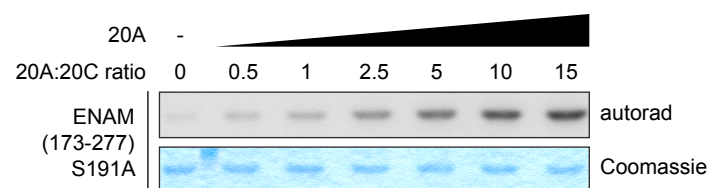

Supplement: supp [file elife-06120-supp-v1.zip › elife_poa_e06120_Figure_5_figure_supplement_1.pdf]

Figure 2-figure supplement 2

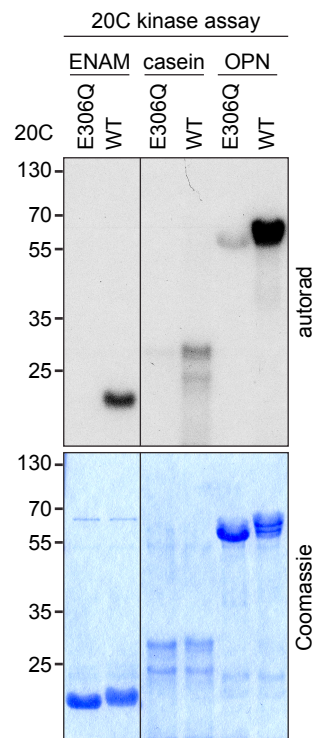

Supplement: supp [file elife-06120-supp-v1.zip › elife_poa_e06120_Figure_2_figure_supplement_2.pdf]

Figure 3-figure supplement 1

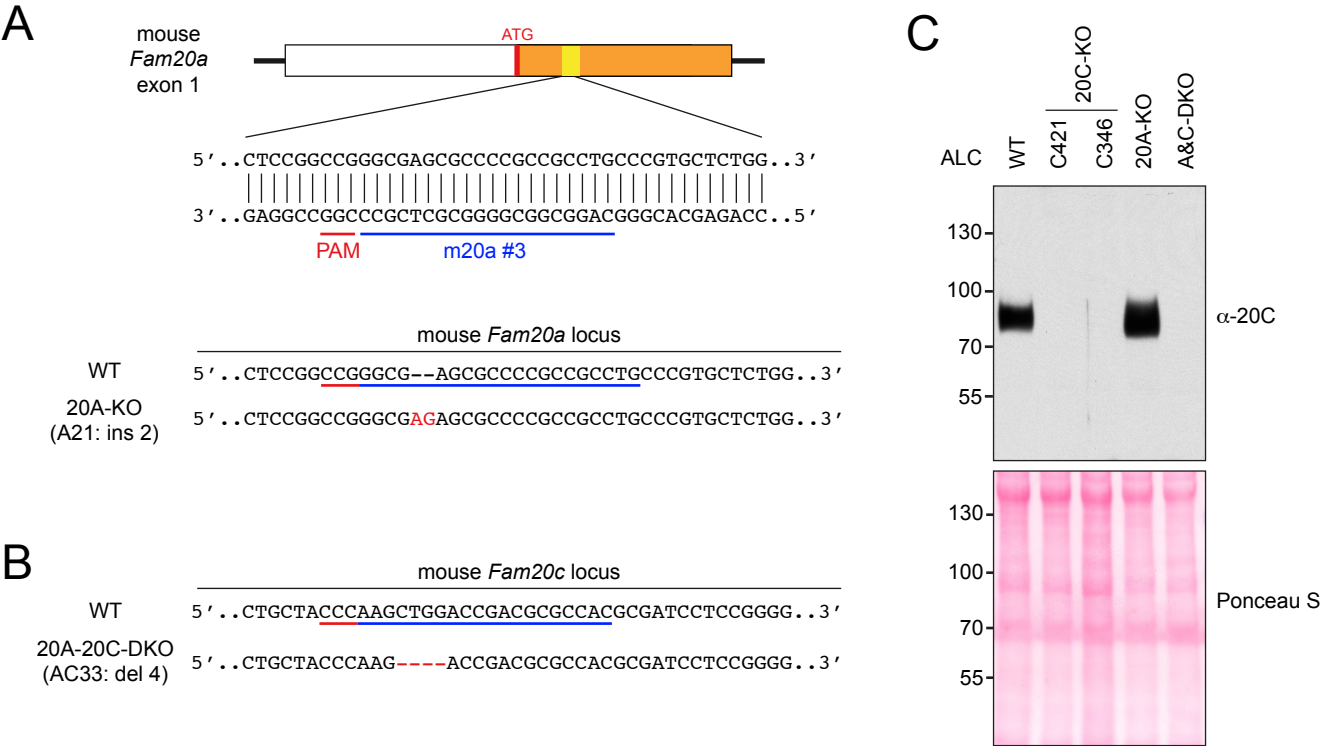

Supplement: supp [file elife-06120-supp-v1.zip › elife_poa_e06120_Figure_3_figure_supplement_1.pdf]

Figure 3-figure supplement 2

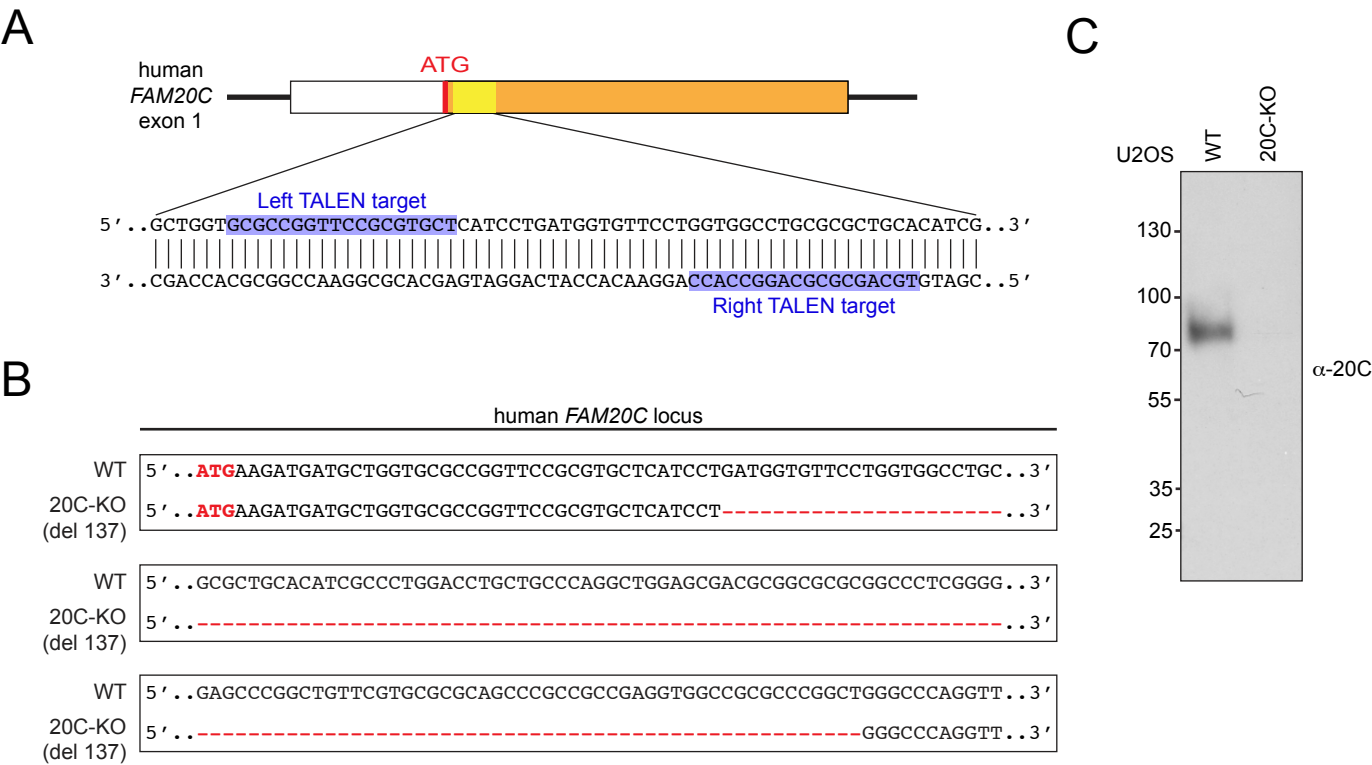

Supplement: supp [file elife-06120-supp-v1.zip › elife_poa_e06120_Figure_3_figure_supplement_2.pdf]

## Figure 4-figure supplement 2

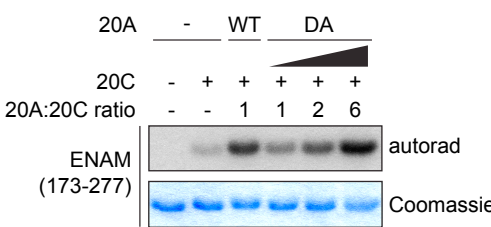

Supplement: supp [file elife-06120-supp-v1.zip › elife_poa_e06120_Figure_4_figure_supplement_2.pdf]

Figure 4-figure supplement 3

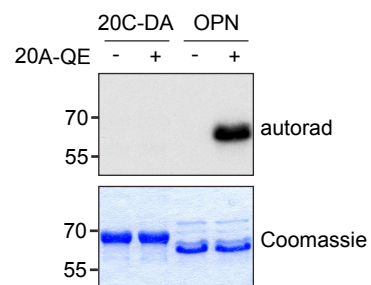

Supplement: supp [file elife-06120-supp-v1.zip › elife_poa_e06120_Figure_4_figure_supplement_3.pdf]

Figure 4-figure supplement 1

A

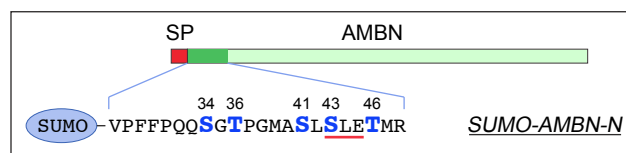

B

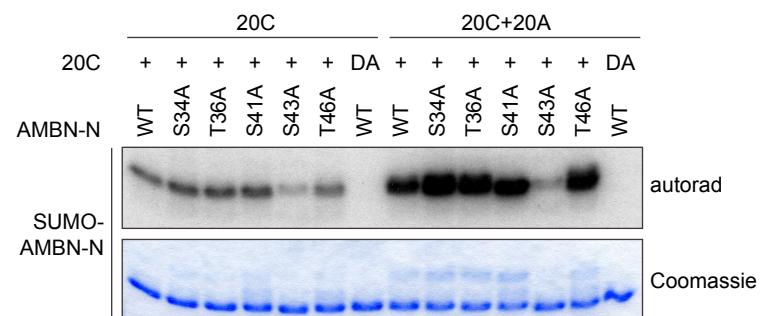

Supplement: supp [file elife-06120-supp-v1.zip › elife_poa_e06120_Figure_4_figure_supplement_1.pdf]

Figure 1-figure supplement 1

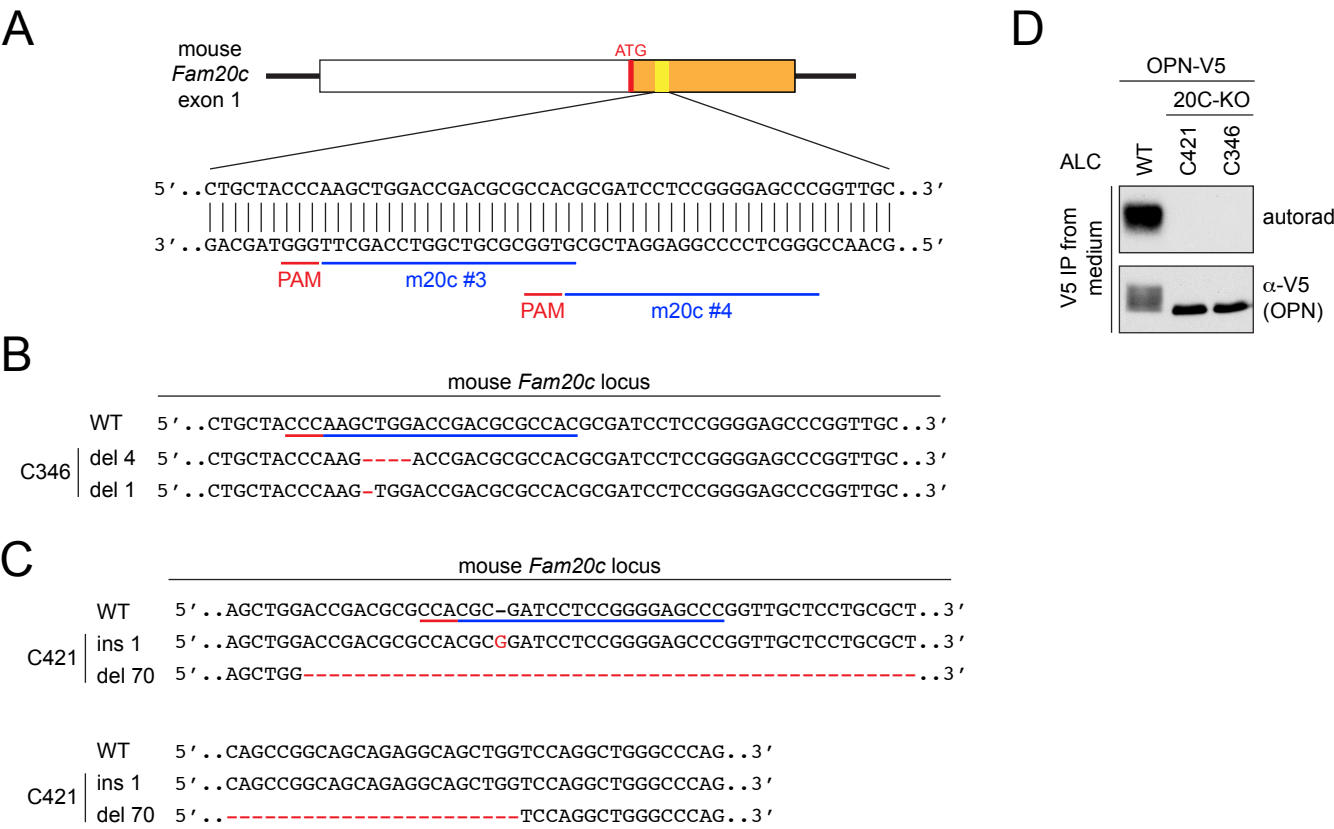

Supplement: supp [file elife-06120-supp-v1.zip › elife_poa_e06120_Figure_1_figure_supplement_1.pdf]
